# Supplementary material for: Pediatric Medical Subspecialist Use in Outpatient Settings
Source: PubMed Central journal article supplement (PMC10767594; doi:10.1001/jamanetworkopen.2023.50379), 2024-01-04
Supplement: jamanetwopen-e2350379-s001.pdf [file jamanetwopen-e2350379-s001.pdf]

## Data Sharing Statement

Forrest. Pediatric Medical Subspecialist Use in Outpatient Settings. *JAMA Netw Open*.  
Published January 04, 2024. doi:10.1001/jamanetworkopen.2023.50379

### Data

**Data available:** No

### Additional Information

**Explanation for why data not available:** The data are not from consented patients. They are from repurposed EHR and claims data. We cannot make the patient-level data available as a result. The NASEM website does contain much more detailed reports of aggregate data for all three data sources.
